# Supplementary material for: Milk peptides found in human jejunum induce enteroendocrine hormone secretion and inhibit DPP-IV
Source: Royal Society of Chemistry journal article supplement (doi:10.1039/d5fo01394a), 2025-01-01
Supplement: d5fo01394a1.pdf [file d5fo01394a1.pdf]

## Supplementary Material

### **Milk peptides found in human jejunum after whey or casein intake induce CCK and GLP-1 secretion and inhibit DPP-IV**

Santiago María Vivanco-Maroto<sup>a,1</sup>, Cristina Gómez-Marín<sup>a,b,1</sup>, Isidra Recio<sup>a</sup>, Beatriz Miralles<sup>a</sup>

<sup>a</sup>Instituto de Investigación en Ciencias de la Alimentación, CIAL (CSIC-UAM, CEI UAM + CSIC), Nicolás Cabrera, 9, 28049 Madrid, Spain

<sup>b</sup>Escuela de Doctorado, Universidad Autónoma de Madrid, C. Francisco Tomás y Valiente, 2, 28049 Madrid, Spain

<sup>1</sup> Both authors have contributed equally to this paper

Corresponding author: Beatriz Miralles

E-mail address: [beatriz.miralles@csic.es](mailto:beatriz.miralles@csic.es)

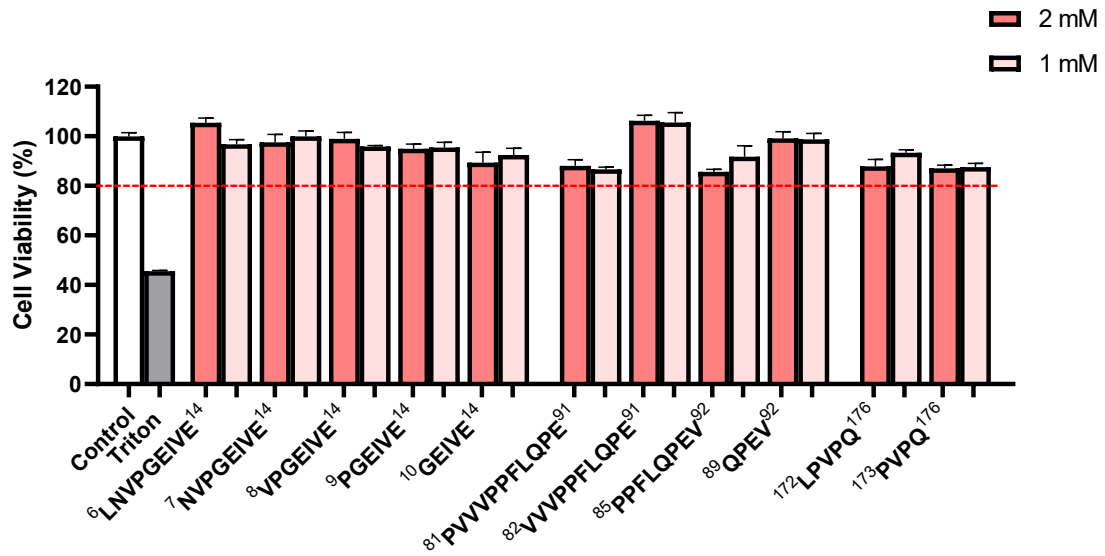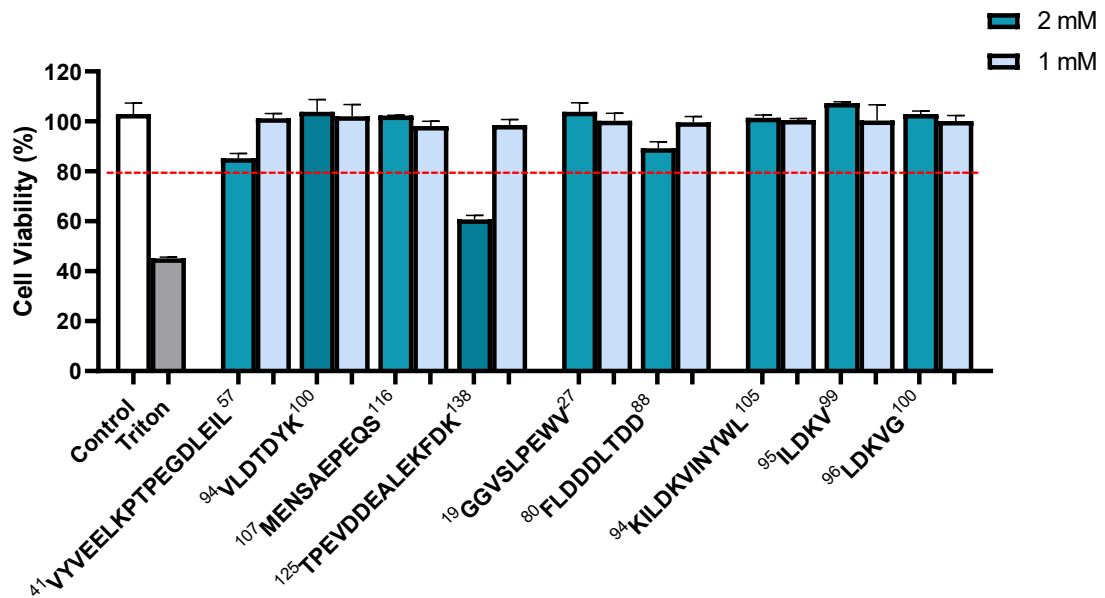

Supplementary 1. Cell viability in STC-1 cells following 2 h of incubation with synthetic peptides derived from casein,  $\beta$ -lactoglobulin, and  $\alpha$ -lactalbumin. Cell experiments were performed in triplicate, followed by technical triplicates.

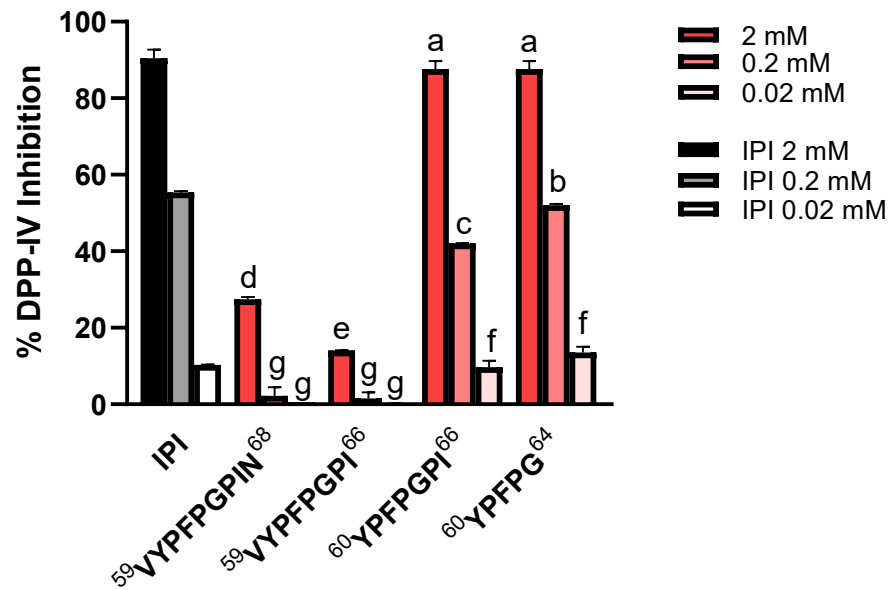

Supplementary 2. DPP-IV enzyme inhibition in the presence of  $\beta$ -casein peptides at different protein concentrations (2.00, 0.20, and 0.02 mM) using Caco-2 cells. Error bars indicate SEM (n=3). Statistical significance compared between different samples is indicated by different letters (one-way ANOVA with Tukey's post hoc test). IPI is the positive control
